# Supplementary material for: Plastoquinone-Derivative SkQ1 Improved the Biliary Intraepithelial Neoplasia during Liver Fluke Infection
Source: MDPI journal article supplement (doi:10.3390/cimb46020103), 2024-02-17
Supplement: s1 [file s1]

**Supplementary Table S1. Primers and probes**

| <b>Primer</b>                    | <b>Sequences</b>               |
|----------------------------------|--------------------------------|
| <i>Gapdh_F</i>                   | GAACATCATCCCTGCATCCACT         |
| <i>Gapdh_R</i>                   | ATGCCTGCTTCACCACCTTCTT         |
| <i>TNF-<math>\alpha</math>_F</i> | TCTTCAGAGTCCATCTCCCTC          |
| <i>TNF-<math>\alpha</math>_R</i> | GGGAATTCTGGAAACCGTTTG          |
| <i>Ck-7_F</i>                    | AGCTTCCCCGGATCTTTGAG           |
| <i>Ck-7_R</i>                    | CGTCCTTCTTCAGCAACACAAAC        |
| <i>Inos_F</i>                    | CATGACTTCCAGAACAGAGGG3         |
| <i>Inos_R</i>                    | GCCATCTCCTGCATCTCTTC3          |
| <i>Inos_probe</i>                | R6G-CGGCACCCAAACACCAAGGTC-BHQ2 |
| <i>Acta2_F</i>                   | GGATGCAGAAGGAGATCACAG          |
| <i>Acta2_R</i>                   | TGGAAGGTAGACAGAGACGC           |
| <i>Acta2_probe</i>               | R6G-TTCATGGTGCTGGGTGCGAGA-BHQ2 |
| <i>Alox5_F</i>                   | AGATCGTGGCTACTCTACCAG          |
| <i>Alox5_R</i>                   | TCCTTCACTGGCTTCTCAATG          |
| <i>Alox5_probe</i>               | R6G-AATGCCCACACTGCGCCTAGA-BHQ2 |
| <i>TGF-<math>\beta</math>_F</i>  | CCAACTATTGCTTCAGCTCCAC         |
| <i>TGF-<math>\beta</math>_R</i>  | CAGGGCCAGGACCTTGCT             |
