# Supplementary material for: Plastoquinone-Derivative SkQ1 Improved the Biliary Intraepithelial Neoplasia during Liver Fluke Infection
Source: MDPI journal article supplement (doi:10.3390/cimb46020103), 2024-02-17
Supplement: s1 [file s1]

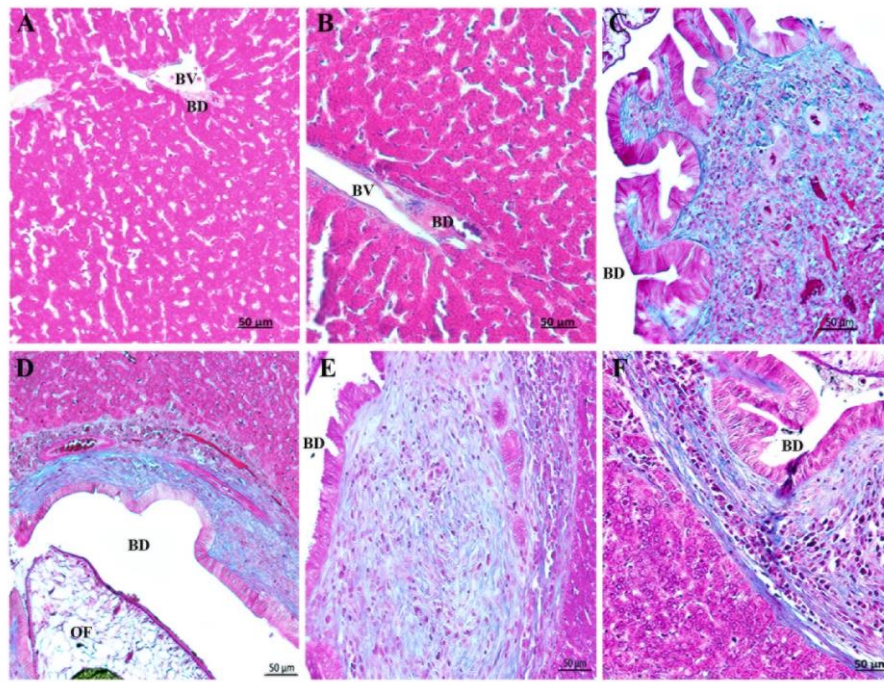

**Supplementary Figure S1. Masson's Trichrome staining of liver sections to reveal connective tissue (blue).** Representative images are presented. **A** – uninfected; **B** - uninfected, SkQ1 treated; **C** - *O. felineus*-infected 1 month p.i.; **D** - *O. felineus*-infected and SkQ1 treated 1 month p.i.; **E**- *O. felineus*-infected 3 months p.i.; **F**- *O. felineus*-infected and SkQ1 treated 3 months p.i.
