# Supplementary material for: Plastoquinone-Derivative SkQ1 Improved the Biliary Intraepithelial Neoplasia during Liver Fluke Infection
Source: MDPI journal article supplement (doi:10.3390/cimb46020103), 2024-02-17
Supplement: s1 [file s1]

**Supplementary Table S3. Serum biochemistry**

|                                                     | <b>Reference</b> | <b>Uninfected,<br/>mean <math>\pm</math> SD</b> | <b>SKQ1,<br/>mean <math>\pm</math> SD</b> | <b>Infected,<br/>mean <math>\pm</math> SD</b> | <b>Infected +<br/>SkQ1, mean<br/><math>\pm</math> SD</b> |
|-----------------------------------------------------|------------------|-------------------------------------------------|-------------------------------------------|-----------------------------------------------|----------------------------------------------------------|
| <b>1 month</b>                                      |                  |                                                 |                                           |                                               |                                                          |
| <b>ALT, u L-1</b>                                   | 38.0 $\pm$ 26.1  | 35.9 $\pm$ 10.3                                 | 38.7 $\pm$ 3.3                            | 247.8 $\pm$ 67.1*<br>p=0.02                   | 204.3 $\pm$ 77                                           |
| <b>AST, u L-1</b>                                   | 47.0 $\pm$ 38.3  | 51.5 $\pm$ 8.7                                  | 43.4 $\pm$ 8.4                            | 87.1 $\pm$ 30.4                               | 53.7 $\pm$ 12                                            |
| <b>Total bilirubin,<br/><math>\mu</math>mol L-1</b> | 3.4 - 12.6       | 6.9 $\pm$ 4.2                                   | 11.6 $\pm$ 2.5*<br>P=0.03                 | 24.7 $\pm$ 5.6 *<br>P=0.02                    | 16.4 $\pm$ 3.4                                           |
| <b>Total<br/>cholesterol,<br/>mmol L-1</b>          | 2.9 - 5.4        | 1.6 $\pm$ 0.2                                   | 2 $\pm$ 0.4                               | 2.9 $\pm$ 0.5 *<br>P=0.02                     | 3.9 $\pm$ 2                                              |
| <b>Triglycerides,<br/>mmol L-1</b>                  | 0.8 - 2.6        | 1.0 $\pm$ 0.3                                   | 0.8 $\pm$ 0.4                             | 1.1 $\pm$ 0.1                                 | 1.8 $\pm$ 0.2**<br>P=0.009                               |
| <b>Urea,<br/>mmol L-1</b>                           | 3.2 $\pm$ 0.7    | 4.7 $\pm$ 1.6                                   | 8.8 $\pm$ 1.2*<br>P= 0.02                 | 5.1 $\pm$ 1.0                                 | 5.4 $\pm$ 1.1                                            |
| <b>Creatinine, <math>\mu</math>mol<br/>L-1</b>      | 90.1 $\pm$ 23.4  | 53.8 $\pm$ 45.6                                 | 89.7 $\pm$ 22.2                           | 112 $\pm$ 49.8                                | 110.5 $\pm$ 98.8                                         |
| <b>3 months</b>                                     |                  |                                                 |                                           |                                               |                                                          |
| <b>ALT, u L-1</b>                                   | 38.0 $\pm$ 26.1  | 35.9 $\pm$ 10.3                                 | 45.7 $\pm$ 16.5                           | 356.7 $\pm$ 150.9*<br>P=0.03                  | 212.2 $\pm$ 77                                           |
| <b>AST, u L-1</b>                                   | 47.0 $\pm$ 38.3  | 51.5 $\pm$ 8.7                                  | 53 $\pm$ 22.3                             | 95.0 $\pm$ 37.6 *<br>P=0.03                   | 83.3 $\pm$ 20.5                                          |
| <b>Total bilirubin,<br/><math>\mu</math>mol L-1</b> | 3.4 - 12.6       | 3.4 $\pm$ 1.6                                   | 3.3 $\pm$ 0.3                             | 9.4 $\pm$ 6.1 **<br>P=0.01                    | 5.9 $\pm$ 1.6                                            |
| <b>Total<br/>cholesterol,<br/>mmol L-1</b>          | 2.9 - 5.4        | 1.6 $\pm$ 0.2                                   | 1.7 $\pm$ 0.1                             | 2.9 $\pm$ 0.5 **<br>P=0.01                    | 2.2 $\pm$ 0.5                                            |
| <b>Triglycerides,<br/>mmol L-1</b>                  | 0.8 - 2.6        | 0.46 $\pm$ 0.42                                 | 1 $\pm$ 0.5                               | 0.67 $\pm$ 0.12                               | 2 $\pm$ 0.8\$\$\$*<br>P=0.01                             |
| <b>Urea,<br/>mmol L-1</b>                           | 3.2 $\pm$ 0.7    | 7.2 $\pm$ 1.0                                   | 7.4 $\pm$ 0.4                             | 5.7 $\pm$ 1.2                                 | 6.7 $\pm$ 2.4                                            |
| <b>Creatinine, <math>\mu</math>mol<br/>L-1</b>      | 90.1 $\pm$ 23.4  | 131 $\pm$ 81                                    | 67.3 $\pm$ 44.6                           | 83.8 $\pm$ 45.3                               | 87.7 $\pm$ 53                                            |

P values were obtained by the Mann–Whitney U test. \* difference between groups (treatment vs. control), \$ difference between groups (treatment vs. infected group), \*\$ p< 0.05; \*\*SS p< 0.01 # parameter values taken from (Van Hoosier, G.L., McPherson, C.W., 1987. Laboratory hamster. Academic Press Inc., New York) Abbreviation: SD, standard deviation; ALT, Alanine transaminase; AST, Aspartate aminotransferase
